# Supplementary material
Source: PubMed Central journal article supplement (PMC8935658)
Supplement: NIHMS1779305-supplement-mmc1.pdf [file NIHMS1779305-supplement-mmc1.pdf]

## Supporting Information List:

|                                                                               |       |
|-------------------------------------------------------------------------------|-------|
| <a href="#"><u>Supporting Information S1: PSF of FSE</u></a>                  | II    |
| <a href="#"><u>Supporting Information S2: ruCNR Optimization of FSE</u></a>   | IV    |
| <a href="#"><u>Supporting Information S3: MTF of FLASH</u></a>                | VI    |
| <a href="#"><u>Supporting Information S4: PSF of FLASH</u></a>                | VII   |
| <a href="#"><u>Supporting Information S5: ruCNR Optimization of FLASH</u></a> | IX    |
| <a href="#"><u>Supporting Information S6: Sacrificed ruCNR of FLASH</u></a>   | XIV   |
| <a href="#"><u>Supporting Information S7: PSF of bSSFP</u></a>                | XVI   |
| <a href="#"><u>Supporting Information S8: ruCNR Optimization of bSSFP</u></a> | XVIII |
| <a href="#"><u>Supporting Information S9: Sacrificed ruCNR of bSSFP</u></a>   | XXIV  |

## Supporting Information S1: PSF of FSE

The PSF of the FSE with a linear (LN) profile order is derived from Eq. (4) and (11):

$$\begin{aligned}
PSF_{FSE}^{LN}(z) &= \int_{-0.5}^{0.5} MTF_{FSE}^{LN}(k) e^{i2\pi kz} dk \\
&= \int_{-0.5}^{0.5} M_{prep} \cdot E_2^{(k+0.5)N} e^{i2\pi kz} dk \\
&= M_{prep} \cdot E_2^{0.5N} \int_{-0.5}^{0.5} e^{\ln E_2 k N} e^{i2\pi kz} dk \\
&= M_{prep} \cdot E_2^{0.5N} \int_{-0.5}^{0.5} e^{(i2\pi z + N \ln E_2)k} dk \\
&= M_{prep} \cdot E_2^{0.5N} \left. \frac{e^{(i2\pi z + N \ln E_2)k}}{i2\pi z + N \ln E_2} \right|_{-0.5}^{0.5} \\
&= M_{prep} \cdot E_2^{0.5N} \frac{e^{0.5(i2\pi z + N \ln E_2)} - e^{-0.5(i2\pi z + N \ln E_2)}}{i2\pi z + N \ln E_2} \\
&= M_{prep} \cdot E_2^{0.5N} \frac{E_2^{0.5N} e^{i\pi z} - E_2^{-0.5N} e^{-i\pi z}}{i2\pi z + N \ln E_2} \\
&= M_{prep} \cdot \frac{E_2^N e^{i\pi z} - e^{-i\pi z}}{N \ln E_2 + i2\pi z}
\end{aligned} \tag{S1.1}$$

The PSF of the FSE with a low-high (LH) profile order is derived from Eq. (4) and (12):

$$\begin{aligned}
PSF_{FSE}^{LH}(z) &= \int_{-0.5}^{0.5} MTF_{FSE}^{LH}(k) e^{i2\pi kz} dk \\
&= \int_{-0.5}^{0.5} M_{prep} \cdot E_2^{2|k|N} e^{i2\pi kz} dk \\
&= M_{prep} \cdot \left( \int_{-0.5}^0 E_2^{-2kN} e^{i2\pi kz} dk + \int_0^{0.5} E_2^{2kN} e^{i2\pi kz} dk \right)
\end{aligned}$$

$$\begin{aligned}
&= M_{prep} \cdot \left( \int_{-0.5}^0 e^{2(i\pi z - N \ln E_2)k} dk + \int_0^{0.5} e^{2(i\pi z + N \ln E_2)k} dk \right) \\
&= M_{prep} \cdot \left( \frac{e^{2(i\pi z - N \ln E_2)k}}{2(i\pi z - N \ln E_2)} \Big|_{-0.5}^0 + \frac{e^{2(i\pi z + N \ln E_2)k}}{2(i\pi z + N \ln E_2)} \Big|_0^{0.5} \right) \\
&= M_{prep} \cdot \left( \frac{1 - e^{N \ln E_2 - i\pi z}}{2(i\pi z - N \ln E_2)} + \frac{e^{i\pi z + N \ln E_2} - 1}{2(i\pi z + N \ln E_2)} \right) \\
&= M_{prep} \cdot \left( \frac{e^{N \ln E_2 - i\pi z} - 1}{2(N \ln E_2 - i\pi z)} + \frac{e^{i\pi z + N \ln E_2} - 1}{2(N \ln E_2 + i\pi z)} \right) \\
&= M_{prep} \cdot \frac{(E_2^N e^{-i\pi z} - 1)(N \ln E_2 + i\pi z) + (E_2^N e^{i\pi z} - 1)(N \ln E_2 - i\pi z)}{2(N \ln E_2 - i\pi z)(N \ln E_2 + i\pi z)} \\
&= M_{prep} \cdot \frac{N \ln E_2 (E_2^N (e^{i\pi z} + e^{-i\pi z}) - 2) - i\pi x \varepsilon^N (e^{i\pi z} - e^{-i\pi z})}{2N^2 \ln^2 E_2 + 2\pi^2 z^2} \\
&= M_{prep} \cdot \frac{2E_2^N N \ln \varepsilon \cos(\pi z) + 2E_2^N \pi z \sin(\pi z) - 2N \ln \varepsilon}{2N^2 \ln^2 E_2 + 2\pi^2 z^2} \\
&= M_{prep} \cdot \frac{E_2^N N \ln E_2 \cos(\pi z) + E_2^N \pi x \sin(\pi z) - N \ln E_2}{N^2 \ln^2 E_2 + \pi^2 z^2} \tag{S1.2}
\end{aligned}$$

## Supporting Information S2: ruCNR Optimization of FSE

To simplify Eq. (17), let  $r = -N \ln E_2 = N \cdot TE/T_2$ . We have:

$$ruCNR_{FSE} = \frac{1 - e^{-r}}{\sqrt{r}} \sqrt{T_2} \quad (S2.1)$$

The derivative of  $ruCNR_{FSE}$  w.r.t.  $r$  is:

$$\begin{aligned} \frac{\partial ruCNR_{FSE}}{\partial r} &= \frac{\partial}{\partial r} \frac{1 - e^{-r}}{\sqrt{r}} \sqrt{T_2} = \sqrt{T_2} \frac{\partial}{\partial r} \frac{1 - e^{-r}}{\sqrt{r}} = \sqrt{T_2} \frac{e^{-r}\sqrt{r} - (1 - e^{-r})}{r} \frac{1}{2\sqrt{r}} \\ &= \sqrt{T_2} \frac{2re^{-r} + e^{-r} - 1}{2r\sqrt{r}} \end{aligned} \quad (S2.2)$$

$ruCNR_{FSE}$  has an optimal solution when the numerator of the derivative is 0:

$$2re^{-r} + e^{-r} - 1 = 0$$

$$(r + 0.5)e^{-r} = 0.5$$

$$(r + 0.5)e^{-r-0.5} = 0.5e^{-0.5}$$

$$(-r - 0.5)e^{-r-0.5} = -0.5/\sqrt{e}$$

$$-r - 0.5 = W_{-1}(-0.5/\sqrt{e})$$

$$r = -0.5 - W_{-1}(-0.5/\sqrt{e})$$

$$r \approx 1.26$$

$$N \cdot TE/T_2 = 1.26$$

$$N \cdot TE = 1.26T_2 \quad (S2.3)$$

Here,  $W_{-1}(x)$  is the negative branch of the Lambert W function. The properties of  $W_{-1}(x)$

includes:

$$W_{-1}(x)e^{W_{-1}(x)} = x. \quad (\text{S2.4})$$

$$W_{-1}(xe^x) = x. \quad (\text{S2.5})$$

$$W_{-1}(x) \leq -1 \quad (\text{S2.6})$$

$$W_{-1}(x) = -1. \text{ only when } x = -1/e \quad (\text{S2.7})$$

As a result, the optimal  $ruCNR_{FSE}$  is :

$$ruCNR_{FSE}^* = \frac{1 - e^{-1.26}}{\sqrt{1.26}} \sqrt{T_2} \approx 0.64\sqrt{T_2}. \quad (\text{S2.8})$$

### Supporting Information S3: MTF of FLASH

The solution of  $M_z(n)$  can be derived from Eq. (20):

$$\begin{aligned}
 M_z(n+1) &= M_z(n)\varepsilon + M^0(1 - E_1) \\
 M_z(n+1) &= M_z(n)\varepsilon + M^0(1 - \varepsilon) \frac{1 - E_1}{1 - \varepsilon} \\
 M_z(n+1) - M^0 \frac{1 - E_1}{1 - \varepsilon} &= \left( M_z(n) - M^0 \frac{1 - E_1}{1 - \varepsilon} \right) \varepsilon \\
 M_z(n) - M^0 \frac{1 - E_1}{1 - \varepsilon} &= \left( M_{prep} - M^0 \frac{1 - E_1}{1 - \varepsilon} \right) \varepsilon^{n-1} \\
 M_z(n) &= \left( M_{prep} - M^0 \frac{1 - E_1}{1 - \varepsilon} \right) \varepsilon^{n-1} + M^0 \frac{1 - E_1}{1 - \varepsilon} \\
 &= M_{prep} \cdot \varepsilon^{n-1} + M^0 \frac{1 - E_1}{1 - \varepsilon} \cdot (1 - \varepsilon^{n-1}).
 \end{aligned} \tag{S3.1}$$

We can derive an effective decay time ( $T_1^*$ ) from Eq: (24):

$$M_{xy}(n) = M_{ss} + (M_{prep} E_2^* \sin \alpha - M_{ss}) \cdot \varepsilon^{n-1}$$

$$\text{Let: } A = M_{ss}, B = (M_{prep} E_2^* \sin \alpha - M_{ss}) / \varepsilon$$

$$M_{xy}(n) = A + B \cdot \varepsilon^n \tag{S3.2}$$

There is a relation between n and the decay time t:  $t = n \cdot TR$ , or  $n = t/TR$ . Therefore:

$$\begin{aligned}
 \varepsilon^n &= e^{n \ln \varepsilon} = e^{\frac{t}{TR} \ln \varepsilon} = e^{-t \left( \frac{-\ln \varepsilon}{TR} \right)} = e^{-t \left( \frac{-\ln(e^{-TR/T_1} \cos \alpha)}{TR} \right)} = e^{-t \left( \frac{-(\ln e^{-TR/T_1} + \ln \cos \alpha)}{TR} \right)} = \\
 &= e^{-t \left( \frac{\frac{TR}{T_1} - \ln \cos \alpha}{TR} \right)} = e^{-t \left( \frac{1}{T_1} - \frac{\ln \cos \alpha}{TR} \right)}
 \end{aligned} \tag{S3.3}$$

From Eq. (S3.3) the effective decay time is:

$$T_1^* = \frac{1}{\frac{1}{T_1} - \frac{\ln \cos \alpha}{TR}} \quad (\text{S3.4})$$

When Ernst angle is used, we have  $\cos \alpha = e^{-TR/T_1}$ . In this situation, the effective decay time is:

$$T_{1,Ernst}^* = \frac{1}{\frac{1}{T_1} - \frac{-TR/T_1}{TR}} = \frac{1}{\frac{1}{T_1} + \frac{1}{T_1}} = \frac{T_1}{2} \quad (\text{S3.4})$$

## Supporting Information S4: PSF of FLASH

The PSF of the FLASH with a linear (LN) profile order is derived from Eq. (4) and (25):

$$\begin{aligned}
PSF_{FLASH}^{LN}(z) &= \int_{-0.5}^{0.5} MTF_{FLASH}^{LN}(k) e^{i2\pi kz} dk \\
&= \int_{-0.5}^{0.5} [(M_{prep} \cdot E_2^* \sin \alpha - M_{SS}) \cdot \varepsilon^{(k+0.5)N} + M_{SS}] e^{i2\pi kz} dk \\
&= (M_{prep} \cdot E_2^* \sin \alpha - M_{SS}) \cdot \int_{-0.5}^{0.5} \varepsilon^{(k+0.5)N} e^{i2\pi kz} dk + M_{SS} \cdot \int_{-0.5}^{0.5} e^{i2\pi kz} dk \\
&= (M_{prep} \cdot E_2^* \sin \alpha - M_{SS}) \cdot \varepsilon^{0.5N} \int_{-0.5}^{0.5} e^{(i2\pi z + N \ln \varepsilon)k} dk + M_{SS} \cdot \int_{-0.5}^{0.5} e^{i2\pi kz} dk \\
&= (M_{prep} \cdot E_2^* \sin \alpha - M_{SS}) \cdot \varepsilon^{0.5N} \left. \frac{e^{(i2\pi z + N \ln \varepsilon)k}}{i2\pi z + N \ln \varepsilon} \right|_{-0.5}^{0.5} + M_{SS} \cdot \left. \frac{e^{i2\pi kz}}{i2\pi z} \right|_{-0.5}^{0.5} \\
&= (M_{prep} \cdot E_2^* \sin \alpha - M_{SS}) \cdot \varepsilon^{0.5N} \frac{e^{0.5(i2\pi z + N \ln \varepsilon)} - e^{-0.5(i2\pi z + N \ln \varepsilon)}}{i2\pi z + N \ln \varepsilon} + M_{SS} \cdot \frac{e^{i\pi z} - e^{-i\pi z}}{i2\pi z} \\
&= (M_{prep} \cdot E_2^* \sin \alpha - M_{SS}) \cdot \varepsilon^{0.5N} \frac{\varepsilon^{0.5N} e^{i\pi z} - \varepsilon^{-0.5N} e^{-i\pi z}}{i2\pi z + N \ln \varepsilon} + M_{SS} \cdot \frac{i2 \sin(\pi z)}{i2\pi z} \\
&= (M_{prep} \cdot E_2^* \sin \alpha - M_{SS}) \cdot \frac{\varepsilon^N e^{i\pi z} - e^{-i\pi z}}{N \ln \varepsilon + i2\pi z} + M_{SS} \cdot \text{sinc}(\pi z) \tag{S4.1}
\end{aligned}$$

The PSF of the FLASH with a low-high (LH) profile order is derived from Eq. (4) and (26):

$$\begin{aligned}
PSF_{FLASH}^{LH}(z) &= \int_{-0.5}^{0.5} MTF_{FLASH}^{LH}(k) e^{i2\pi kz} dk \\
&= \int_{-0.5}^{0.5} [(M_{prep} \cdot E_2^* \sin \alpha - M_{SS}) \cdot \varepsilon^{2|k|N} + M_{SS}] e^{i2\pi kz} dk \\
&= (M_{prep} \cdot E_2^* \sin \alpha - M_{SS}) \cdot \int_{-0.5}^{0.5} \varepsilon^{2|k|N} e^{i2\pi kz} dk + M_{SS} \cdot \int_{-0.5}^{0.5} e^{i2\pi kz} dk \\
&= (M_{prep} \cdot E_2^* \sin \alpha - M_{SS}) \cdot \int_{-0.5}^{0.5} \varepsilon^{2|k|N} e^{i2\pi kz} dk + M_{SS} \cdot \text{sinc}(\pi z)
\end{aligned}$$



$$\begin{aligned}
&= (M_{prep} \cdot E_2^* \sin \alpha - M_{ss}) \left( \int_{-0.5}^0 \varepsilon^{-2kN} e^{i2\pi kz} dk + \int_0^{0.5} \varepsilon^{2kN} e^{i2\pi kz} dk \right) + M_{ss} \text{sinc}(\pi z) \\
&= (M_{prep} \cdot E_2^* \sin \alpha - M_{ss}) \left( \int_{-0.5}^0 e^{2(i\pi z - N \ln \varepsilon)k} dk + \int_0^{0.5} e^{2(i\pi z + N \ln \varepsilon)k} dk \right) + M_{ss} \text{sinc}(\pi z) \\
&= (M_{prep} \cdot E_2^* \sin \alpha - M_{ss}) \left( \frac{e^{2(i\pi z - N \ln \varepsilon)k}}{2(i\pi z - N \ln \varepsilon)} \Big|_{-0.5}^0 + \frac{e^{2(i\pi z + N \ln \varepsilon)k}}{2(i\pi z + N \ln \varepsilon)} \Big|_0^{0.5} \right) + M_{ss} \text{sinc}(\pi z) \\
&= (M_{prep} \cdot E_2^* \sin \alpha - M_{ss}) \left( \frac{1 - e^{N \ln \varepsilon - i\pi z}}{2(i\pi z - N \ln \varepsilon)} + \frac{e^{i\pi z + N \ln \varepsilon} - 1}{2(i\pi z + N \ln \varepsilon)} \right) + M_{ss} \text{sinc}(\pi z) \\
&= (M_{prep} \cdot E_2^* \sin \alpha - M_{ss}) \left( \frac{e^{N \ln \varepsilon - i\pi z} - 1}{2(N \ln \varepsilon - i\pi z)} + \frac{e^{i\pi z + N \ln \varepsilon} - 1}{2(N \ln \varepsilon + i\pi z)} \right) + M_{ss} \text{sinc}(\pi z) \\
&= (M_{prep} \cdot E_2^* \sin \alpha - M_{ss}) \frac{(\varepsilon^N e^{-i\pi z} - 1)(N \ln \varepsilon + i\pi z) + (\varepsilon^N e^{i\pi z} - 1)(N \ln \varepsilon - i\pi z)}{2(N \ln \varepsilon - i\pi z)(N \ln \varepsilon + i\pi z)} \\
&\quad + M_{ss} \text{sinc}(\pi z) \\
&= (M_{prep} \cdot E_2^* \sin \alpha - M_{ss}) \frac{N \ln \varepsilon (\varepsilon^N (e^{i\pi z} + e^{-i\pi z}) - 2) - i\pi x \varepsilon^N (e^{i\pi z} - e^{-i\pi z})}{2\pi^2 z^2 + 2N^2 \ln^2 \varepsilon} \\
&\quad + M_{ss} \text{sinc}(\pi z) \\
&= (M_{prep} \cdot E_2^* \sin \alpha - M_{ss}) \frac{2\varepsilon^N N \ln \varepsilon \cos(\pi z) + 2\varepsilon^N \pi x \sin(\pi z) - 2N \ln \varepsilon}{2\pi^2 z^2 + 2N^2 \ln^2 \varepsilon} + M_{ss} \text{sinc}(\pi z) \\
&= (M_{prep} \cdot E_2^* \sin \alpha - M_{ss}) \frac{\varepsilon^N N \ln \varepsilon \cos(\pi z) + \varepsilon^N \pi x \sin(\pi z) - N \ln \varepsilon}{N^2 \ln^2 \varepsilon + \pi^2 z^2} + M_{ss} \text{sinc}(\pi z). \tag{S4.2}
\end{aligned}$$

## Supporting Information S5: ruCNR Optimization of FLASH

The derivative of  $ruCNR_{FLASH}$  w.r.t. the factor  $N$  according to Eq. (31):

$$\begin{aligned}
 \frac{\partial ruCNR_{FLASH}}{\partial N} &= \frac{\partial}{\partial N} \frac{\varepsilon^N - 1}{\ln \varepsilon} \frac{\sqrt{TR}}{\sqrt{N}} E_2^* \sin \alpha \\
 &= \frac{\sqrt{TR} E_2^* \sin \alpha}{\ln \varepsilon} \frac{\partial}{\partial N} \frac{\varepsilon^N - 1}{\sqrt{N}} \\
 &= \frac{\sqrt{TR} E_2^* \sin \alpha}{\ln \varepsilon} \frac{\partial}{\partial N} \frac{\varepsilon^N \ln \varepsilon \sqrt{N} - (\varepsilon^N - 1)}{N} \frac{1}{2\sqrt{N}} \\
 &= \frac{\sqrt{TR} E_2^* \sin \alpha}{\ln \varepsilon} \frac{2N\varepsilon^N \ln \varepsilon - \varepsilon^N + 1}{2N\sqrt{N}}
 \end{aligned} \tag{S5.1}$$

According to Eq. (S5.1), an optimal factor ( $N^*$ ) maximizes  $ruCNR_{FLASH}$  when the numerator of the derivative is 0, therefore, the part

$$\begin{aligned}
 2N^* \varepsilon^{N^*} \ln \varepsilon - \varepsilon^{N^*} + 1 &= 0 \\
 2N^* e^{N^* \ln \varepsilon} \ln \varepsilon - e^{N^* \ln \varepsilon} &= -1 \\
 (N^* \ln \varepsilon - 0.5) e^{N^* \ln \varepsilon} &= -0.5 \\
 (N^* \ln \varepsilon - 0.5) e^{N^* \ln \varepsilon - 0.5} &= -0.5 e^{-0.5} \\
 N^* \ln \varepsilon - 0.5 &= W_{-1}(-0.5 e^{-0.5}) \\
 N^* &= \frac{W_{-1}(-0.5 e^{-0.5}) + 0.5}{\ln \varepsilon} \approx \frac{-1.26}{\ln \varepsilon}
 \end{aligned} \tag{S5.2}$$

Again,  $W_{-1}(x)$  is the negative branch of the Lambert W function. The properties were described in Eq. (S2.4 - S2.7).

Correspondingly the maximized  $ruCNR_{FLASH}$  is:

$$\begin{aligned}
ruCNR_{FLASH}(N^*) &= \frac{\varepsilon^{N^*} - 1}{\ln \varepsilon} \frac{\sqrt{TR}}{\sqrt{N^*}} E_2^* \sin \alpha \\
&= \frac{e^{N^* \ln \varepsilon} - 1}{\ln \varepsilon} \frac{\sqrt{-TR \ln \varepsilon}}{\sqrt{-W_{-1}(-0.5e^{-0.5}) - 0.5}} E_2^* \sin \alpha \\
&= \frac{e^{W_{-1}(-0.5e^{-0.5})+0.5} - 1}{-\sqrt{-W_{-1}(-0.5e^{-0.5}) - 0.5}} \frac{\sqrt{TR}}{\sqrt{-\ln \varepsilon}} E_2^* \sin \alpha \\
&= \frac{e^{0.5} \frac{-0.5e^{-0.5}}{W_{-1}(-0.5e^{-0.5})} - 1}{-\sqrt{-W_{-1}(-0.5e^{-0.5}) - 0.5}} \frac{\sqrt{TR}}{\sqrt{-\ln \varepsilon}} E_2^* \sin \alpha \\
&= \frac{\frac{-0.5 - W_{-1}(-0.5e^{-0.5})}{W_{-1}(-0.5e^{-0.5})}}{-\sqrt{-W_{-1}(-0.5e^{-0.5}) - 0.5}} \frac{\sqrt{TR}}{\sqrt{-\ln \varepsilon}} E_2^* \sin \alpha \\
&= \frac{\sqrt{-W_{-1}(-0.5e^{-0.5}) - 0.5}}{-W_{-1}(-0.5e^{-0.5})} \frac{\sqrt{TR}}{\sqrt{-\ln \varepsilon}} E_2^* \sin \alpha \\
&\approx 0.64 \frac{\sqrt{TR}}{\sqrt{-\ln \varepsilon}} E_2^* \sin \alpha \tag{S5.3}
\end{aligned}$$

The derivative of  $ruCNR_{FLASH}(N^*)$  w.r.t. flip angle  $\alpha$  is:

$$\begin{aligned}
\frac{\partial ruCNR_{FLASH}(N^*)}{\partial \alpha} &= \frac{\partial}{\partial \alpha} 0.64 \frac{\sqrt{TR}}{\sqrt{-\ln \varepsilon}} E_2^* \sin \alpha \\
&= 0.64 \sqrt{TR} E_2^* \frac{\partial \sin \alpha}{\partial \alpha \sqrt{-\ln \varepsilon}} \\
&= \frac{0.64 \sqrt{TR} E_2^*}{-\ln \varepsilon} \left( \cos \alpha \sqrt{-\ln \varepsilon} - \sin \alpha \frac{\partial \varepsilon}{\partial \alpha} \frac{\partial}{\partial \varepsilon} \sqrt{-\ln \varepsilon} \right) \\
&= \frac{0.64 \sqrt{TR} E_2^*}{-\ln \varepsilon} \left( \cos \alpha \sqrt{-\ln \varepsilon} - \sin \alpha (-E_1 \sin \alpha) \frac{-1/\varepsilon}{2\sqrt{-\ln \varepsilon}} \right) \\
&= \frac{0.64 \sqrt{TR} E_2^*}{-\ln \varepsilon} \left( \cos \alpha \sqrt{-\ln \varepsilon} - E_1 \sin^2 \alpha \frac{1}{2\varepsilon \sqrt{-\ln \varepsilon}} \right)
\end{aligned}$$

$$= \frac{0.64\sqrt{\text{TR}}E_2^*}{2(-\ln \varepsilon)^{1.5} \cos \alpha} (-2 \cos^2 \alpha \ln \varepsilon - \sin^2 \alpha) \quad (\text{S5.4})$$

Therefore, the flip angle that maximize ruCNR satisfies:

$$\begin{aligned} 2 \cos^2 \alpha^* \ln \varepsilon^* + \sin^2 \alpha^* &= 0 \\ \cos^2 \alpha^* (2 \ln E_1 + \ln \cos^2 \alpha^*) + (1 - \cos^2 \alpha^*) &= 0 \\ \cos^2 \alpha^* (\ln \cos^2 \alpha^* + 2 \ln E_1 - 1) &= -1 \end{aligned} \quad (\text{S5.5})$$

Let  $x = \ln \cos^2 \alpha^*$ , then:

$$\begin{aligned} e^x(x + 2 \ln E_1 - 1) &= -1 \\ (x + 2 \ln E_1 - 1)e^{x+2 \ln E_1-1} &= e^{2 \ln E_1-1} = -E_1^2/e \\ x + 2 \ln E_1 - 1 &= W_{-1}(-E_1^2/e) \\ x &= W_{-1}(-E_1^2/e) - 2 \ln E_1 + 1 \\ \cos^2 \alpha^* = e^x &= e^{W_{-1}(-E_1^2/e) - 2 \ln E_1 + 1} = \frac{e}{E_1^2} \frac{-E_1^2/e}{W_{-1}(-E_1^2/e)} = \frac{1}{-W_{-1}(E_1^2/e)} \\ \alpha^* &= \arccos \frac{1}{\sqrt{-W_{-1}(-E_1^2/e)}} \\ \ln \varepsilon^* &= \ln E_1 + \ln \cos \alpha^* = \ln E_1 + 0.5 (W_{-1}(-E_1^2/e) - 2 \ln E_1 + 1) \\ \ln \varepsilon^* &= 0.5(W_{-1}(-E_1^2/e) + 1) \\ N^* &\approx \frac{-1.26}{\ln \varepsilon^*} = \frac{-1.26}{0.5(W_{-1}(-E_1^2/e) + 1)} \approx \frac{-2.51}{W_{-1}(-E_1^2/e) + 1} \end{aligned} \quad (\text{S5.6})$$

The corresponding optimal  $ruCNR_{FLASH}^*$ :

$$ruCNR_{FLASH}^* = 0.64 \frac{\sqrt{\text{TR}}}{\sqrt{-\ln \varepsilon^*}} E_2^* \sin \alpha$$

$$\begin{aligned}
&= \frac{0.64E_2^*\sqrt{TR}}{\sqrt{-0.5(W_{-1}(-E_1^2/e) + 1)}} \sqrt{1 - \cos^2 \alpha^*} \\
&= \frac{0.64E_2^*\sqrt{TR}}{\sqrt{-0.5(W_{-1}(-E_1^2/e) + 1)}} \sqrt{1 - \frac{1}{-W_{-1}(E_1^2/e)}} \\
&= \frac{0.64E_2^*\sqrt{TR}}{\sqrt{-0.5(W_{-1}(-E_1^2/e) + 1)}} \sqrt{\frac{W_{-1}(-E_1^2/e) + 1}{W_{-1}(E_1^2/e)}} \\
&= \frac{0.64E_2^*\sqrt{TR}}{\sqrt{0.5}} \frac{1}{\sqrt{-W_{-1}(-E_1^2/e)}} \\
&\approx \frac{0.90E_2^*\sqrt{TR}}{\sqrt{-W_{-1}(-E_1^2/e)}} \tag{S5.7}
\end{aligned}$$

The derivative of  $ruCNR_{FLASH}^*$  w.r.t.  $TR$  is.

$$\begin{aligned}
\frac{\partial ruCNR_{FLASH}^*}{\partial TR} &= \frac{\partial}{\partial TR} \frac{0.90E_2^*\sqrt{TR}}{\sqrt{-W_{-1}(-E_1^2/e)}} = 0.90E_2^* \frac{\partial}{\partial TR} \frac{\sqrt{TR}}{\sqrt{-W_{-1}(-E_1^2/e)}} \\
&= 0.90E_2^* \frac{\frac{1}{2\sqrt{TR}} \sqrt{-W_{-1}(-E_1^2/e)} - \sqrt{TR} \frac{1}{2\sqrt{-W_{-1}(-E_1^2/e)}} \frac{\partial}{\partial TR} (-W_{-1}(-E_1^2/e))}{-W_{-1}(-E_1^2/e)} \\
&= 0.90E_2^* \frac{-W_{-1}(-E_1^2/e) + TR \frac{W_{-1}(-E_1^2/e)}{-E_1^2/e(1 + W_{-1}(-E_1^2/e))} \frac{\partial(-E_1^2/e)}{\partial TR}}{-2W_{-1}(-E_1^2/e)\sqrt{-T_R W_{-1}(-E_1^2/e)}} \\
&= 0.90E_2^* \frac{-W_{-1}(-E_1^2/e) + TR \frac{W_{-1}(-E_1^2/e)}{-E_1^2/e(1 + W_{-1}(-E_1^2/e))} \frac{-2E_1}{e} \frac{\partial E_1}{\partial TR}}{-2W_{-1}(-E_1^2/e)\sqrt{-T_R W_{-1}(-E_1^2/e)}} \\
&= 0.90E_2^* \frac{-W_{-1}(-E_1^2/e) + TR \frac{2W_{-1}(-E_1^2/e)}{E_1(1 + W_{-1}(-E_1^2/e))} \left(-\frac{1}{T_1}\right) e^{-\frac{TR}{T_1}}}{-2W_{-1}(-E_1^2/e)\sqrt{-TR W_{-1}(-E_1^2/e)}} \\
&= 0.90E_2^* \frac{-1 - \frac{TR}{T_1} \frac{2}{1 + W_{-1}(-E_1^2/e)}}{-2\sqrt{-TR W_{-1}(-E_1^2/e)}}
\end{aligned}$$

$$= 0.90E_2^* \frac{-\left(1 + W_{-1}(-E_1^2/e)\right) + 2 \ln(E_1)}{-2\left(1 + W_{-1}(-E_1^2/e)\right)\sqrt{-TR \cdot W_{-1}(-E_1^2/e)}} \quad (\text{S5.8})$$

Due to the property of the negative branch of Lambert W function (Eq. (S2.6-S2.7)), i.e.,

$W_{-1}(-E_1^2/e) < -1$ , we have  $-\left(1 + W_{-1}(-E_1^2/e)\right) > 0$ , and hence, the denominator is positive.

Now we are going to prove that the numerator is also positive. According to Eq. (S2.4):

$$W_{-1}(-E_1^2/e) = \frac{-E_1^2/e}{e^{W_{-1}(-E_1^2/e)}} = -e^{-(1+W_{-1}(-E_1^2/e))} E_1^2 < -1$$

$$e^{-(1+W_{-1}(-E_1^2/e))} E_1^2 > 1$$

$$-\left(1 + W_{-1}(-E_1^2/e)\right) + 2 \ln(E_1) > 0 \quad (\text{S5.9})$$

As a result, the optimal  $ruCNR_{FLASH}$  is monotonically increasing with  $TR$ .

## Supporting Information S6: Sacrificed ruCNR of FLASH

We assume the The sacrificed  $ruCNR$  is  $\eta$  times the optimal  $ruCNR$ .

$$ruCNR_{FLASH}(N^*) = \eta \cdot ruCNR_{FLASH}^*(TR)$$

By using Eq. S5.3 and Eq. S5.7 we have:

$$0.64 \frac{\sqrt{TR}}{\sqrt{-\ln \varepsilon}} E_2^* \sin \alpha = \eta \frac{0.90 E_2^* \sqrt{TR}}{\sqrt{-W_{-1}(-E_1^2/e)}}$$

$$\frac{\sin \alpha}{\sqrt{-\ln \varepsilon}} = \eta \frac{1.41}{\sqrt{-W_{-1}(-E_1^2/e)}}$$

$$W_{-1}(-E_1^2/e) \sin^2 \alpha = 2\eta^2 \ln \varepsilon$$

$$W_{-1}(-E_1^2/e)(1 - \cos^2 \alpha) = 2\eta^2 \ln \varepsilon$$

$$W_{-1}(-E_1^2/e) \left(1 - \frac{\varepsilon^2}{E_1^2}\right) = 2\eta^2 \ln \varepsilon$$

$$\frac{W_{-1}(-E_1^2/e)}{\eta^2} - \frac{W_{-1}(-E_1^2/e)}{\eta^2 E_1^2} \varepsilon^2 = 2 \ln \varepsilon \quad (S6.1)$$

Define a known parameter:

$$x = \frac{W_{-1}(-E_1^2/e)}{\eta^2 E_1^2} \quad (S6.2)$$

We can rewrite and simplify Eq. S6.1

$$E_1^2 - x\varepsilon^2 = 2 \ln \varepsilon$$

$$-2 \ln \varepsilon + xE_1^2 = xe^{2 \ln \varepsilon}$$

$$(-2 \ln \varepsilon + xE_1^2)e^{-2 \ln \varepsilon} = x$$

$$(-2 \ln \varepsilon + xE_1^2)e^{-2 \ln \varepsilon + xE_1^2} = xe^{xE_1^2}$$

$$\begin{aligned}
-2 \ln \varepsilon + xE_1^2 &= W_{-1}(xe^{xE_1^2}) \\
-2 \ln \varepsilon &= W_{-1}(xe^{xE_1^2}) - xE_1^2 \\
\ln \varepsilon &= \frac{1}{2}(xE_1^2 - W_{-1}(xe^{xE_1^2}))
\end{aligned} \tag{S6.3}$$

We are now able to derive the optimal flip angle with Eq. S6.3 using the property of the Lambert function Eq. (S2.4):

$$\begin{aligned}
\varepsilon &= \sqrt{e^{xE_1^2 - W_{-1}(xe^{xE_1^2})}} = \sqrt{e^{xE_1^2} e^{-W_{-1}(xe^{xE_1^2})}} = \sqrt{e^{xE_1^2} \frac{W_{-1}(-xe^{xE_1^2})}{xe^{xE_1^2}}} = \sqrt{\frac{W_{-1}(xe^{xE_1^2})}{x}} \\
\cos \alpha_{FLASH}^\eta &= \frac{\varepsilon}{E_1} = \sqrt{\frac{W_{-1}(xe^{xE_1^2})}{xE_1^2}} \\
\alpha_{FLASH}^\eta &= \arccos\left(\sqrt{\frac{W_{-1}(xe^{xE_1^2})}{xE_1^2}}\right)
\end{aligned} \tag{S6.4}$$

The optimal N can be calculated from Eq. 5.2 and Eq. S6.3:

$$N_{FLASH}^\eta = \frac{-1.26}{\ln \varepsilon} = \frac{2.51}{W_{-1}(xe^{xE_1^2}) - xE_1^2} \tag{S6.5}$$



## Supporting Information S7: PSF of bSSFP

The PSF of the bSSFP with a linear (LN) profile order is derived from Eq. (4) and (39).

$$\begin{aligned}
PSF_{bSSFP}^{LN}(z) &= \int_{-0.5}^{0.5} MTF_{bSSFP}^{LN}(k) e^{i2\pi kz} dk \\
&= \int_{-0.5}^{0.5} [(M_{prep} \cdot \sin(\alpha/2) - M_{ss}) \cdot \lambda^{(k+0.5)N} + M_{ss}] e^{i2\pi kz} dk \\
&= (M_{prep} \cdot \sin(\alpha/2) - M_{ss}) \cdot \lambda^{0.5N} \int_{-0.5}^{0.5} e^{(i2\pi z + \ln \lambda)k} dk + M_{ss} \cdot \int_{-0.5}^{0.5} e^{i2\pi kz} dk \\
&= (M_{prep} \cdot \sin(\alpha/2) - M_{ss}) \cdot \lambda^{0.5N} \frac{e^{(i2\pi z + \ln \lambda)k}}{i2\pi z + \ln \lambda} \Big|_{-0.5}^{0.5} + M_{ss} \frac{e^{i2\pi zk}}{i2\pi z} \Big|_{-0.5}^{0.5} \\
&= (M_{prep} \cdot \sin(\alpha/2) - M_{ss}) \cdot \lambda^{0.5N} \frac{e^{0.5(i2\pi z + \ln \lambda)} - e^{-0.5(i2\pi z + \ln \lambda)}}{i2\pi z + \ln \lambda} + M_{ss} \cdot \frac{e^{i\pi z} - e^{-i\pi z}}{i2\pi z} \\
&= (M_{prep} \cdot \sin(\alpha/2) - M_{ss}) \cdot \lambda^{0.5N} \frac{\lambda^{0.5N} e^{i\pi z} - \lambda^{-0.5N} e^{-i\pi z}}{i2\pi z + \ln \lambda} + M_{ss} \cdot \frac{i2 \sin(\pi z)}{i2\pi z} \\
&= (M_{prep} \cdot \sin(\alpha/2) - M_{ss}) \cdot \frac{\lambda^N e^{i\pi z} - e^{-i\pi z}}{N \ln \lambda + i2\pi z} + M_{ss} \cdot \text{sinc}(\pi z)
\end{aligned} \tag{S7.1}$$

The PSF of the bSSFP with a low-high profile order is derived from Eq. (4) and (40):

$$\begin{aligned}
PSF_{bSSFP}^{LH}(z) &= \int_{-0.5}^{0.5} MTF_{bSSFP}^{LH}(k) e^{i2\pi kz} dk \\
&= \int_{-0.5}^{0.5} [(M_{prep} \cdot \sin(\alpha/2) - M_{ss}) \cdot \lambda^{2|k|N} + M_{ss}] e^{i2\pi kz} dk \\
&= (M_{prep} \cdot \sin(\alpha/2) - M_{ss}) \cdot \int_{-0.5}^{0.5} \lambda^{2|k|N} e^{i2\pi kz} dk + M_{ss} \cdot \int_{-0.5}^{0.5} e^{i2\pi kz} dk \\
&= (M_{prep} \cdot \sin(\alpha/2) - M_{ss}) \left( \int_{-0.5}^0 \lambda^{-2kN} e^{i2\pi kz} dk + \int_0^{0.5} \lambda^{2kN} e^{i2\pi kz} dk \right) + M_{ss} \cdot \text{sinc}(\pi z) \\
&= (M_{prep} \cdot \sin(\alpha/2) - M_{ss}) \left( \int_{-0.5}^0 e^{2(i\pi z - N \ln \lambda)k} dk + \int_0^{0.5} e^{2(i\pi z + N \ln \lambda)k} dk \right) + M_{ss} \cdot \text{sinc}(\pi z)
\end{aligned}$$

$$\begin{aligned}
&= (M_{prep} \cdot \sin(\alpha/2) - M_{ss}) \cdot \left( \frac{e^{2(i\pi z - N \ln \lambda)k}}{2(i\pi z - N \ln \lambda)} \Big|_{-0.5}^0 + \frac{e^{2(i\pi z + N \ln \lambda)k}}{2(i\pi z + N \ln \lambda)} \Big|_0^{0.5} \right) + M_{ss} \cdot \text{sinc}(\pi z) \\
&= (M_{prep} \cdot \sin(\alpha/2) - M_{ss}) \cdot \left( \frac{1 - e^{N \ln \lambda - i\pi z}}{2(i\pi z - N \ln \lambda)} + \frac{e^{i\pi z + N \ln \lambda} - 1}{2(i\pi z + N \ln \lambda)} \right) + M_{ss} \cdot \text{sinc}(\pi z) \\
&= (M_{prep} \cdot \sin(\alpha/2) - M_{ss}) \cdot \left( \frac{e^{N \ln \lambda - i\pi z} - 1}{2(N \ln \lambda - i\pi z)} + \frac{e^{i\pi z + N \ln \lambda} - 1}{2(N \ln \lambda + i\pi z)} \right) + M_{ss} \cdot \text{sinc}(\pi z) \\
&= (M_{prep} \cdot \sin(\alpha/2) - M_{ss}) \cdot \frac{(\lambda^N e^{-i\pi z} - 1)(N \ln \lambda + i\pi z) + (\lambda^N e^{i\pi z} - 1)(N \ln \lambda - i\pi z)}{2(N \ln \lambda - i\pi z)(N \ln \lambda + i\pi z)} \\
&\quad + M_{ss} \cdot \text{sinc}(\pi z) \\
&= (M_{prep} \cdot \sin(\alpha/2) - M_{ss}) \cdot \frac{N \ln \lambda (\varepsilon^N (e^{i\pi z} + e^{-i\pi z}) - 2) - i\pi x \lambda^N (e^{i\pi z} - e^{-i\pi z})}{2\pi^2 z^2 + 2N^2 \ln^2 \lambda} \\
&\quad + M_{ss} \cdot \text{sinc}(\pi z) \\
&= (M_{prep} \cdot \sin(\alpha/2) - M_{ss}) \cdot \frac{2\lambda^N N \ln \lambda \cos(\pi z) + 2\lambda^N \pi x \sin(\pi z) - 2N \ln \lambda}{2\pi^2 z^2 + 2N^2 \ln^2 \lambda} + M_{ss} \cdot \text{sinc}(\pi z) \\
&= (M_{prep} \cdot \sin(\alpha/2) - M_{ss}) \cdot \frac{\lambda^N N \ln \lambda \cos(\pi z) + \lambda^N \pi z \sin(\pi z) - N \ln \lambda}{N^2 \ln^2 \lambda + \pi^2 x z^2} + M_{ss} \cdot \text{sinc}(\pi z) \tag{S7.2}
\end{aligned}$$

## Supporting Information S8: ruCNR Optimization of bSSFP

The derivative of  $ruCNR_{bSSFP}$  w.r.t. the factor  $N$  according to Eq. (45):

$$\begin{aligned}
 \frac{\partial ruCNR_{bSSFP}}{\partial N} &= \frac{\partial}{\partial N} \frac{\lambda^N - 1}{\ln \lambda} \frac{\sqrt{TR}}{\sqrt{N}} \sin(\alpha/2) \\
 &= \frac{\sqrt{TR} \sin(\alpha/2)}{\ln \lambda} \frac{\partial}{\partial N} \frac{\lambda^N - 1}{\sqrt{N}} \\
 &= \frac{\sqrt{TR} \sin(\alpha/2)}{\ln \lambda} \frac{\partial}{\partial N} \frac{\lambda^N \ln \lambda \sqrt{N} - (\lambda^N - 1) \frac{1}{2\sqrt{N}}}{N} \\
 &= \frac{\sqrt{TR} \sin(\alpha/2)}{\ln \lambda} \frac{2N\lambda^N \ln \lambda - \lambda^N + 1}{2N\sqrt{N}}
 \end{aligned} \tag{S8.1}$$

An optimal bSSFP factor ( $N^*$ ) maximizes  $ruCNR_{bSSFP}$  when the numerator of the derivative is

0:

$$\begin{aligned}
 2N^* \lambda^{N^*} \ln \lambda - \lambda^{N^*} + 1 &= 0 \\
 2N^* e^{N^* \ln \lambda} \ln \lambda - e^{N^* \ln \lambda} + 1 &= 0 \\
 (2N^* \ln \lambda - 1) e^{N^* \ln \lambda} &= -1 \\
 (N^* \ln \lambda - 0.5) e^{N^* \ln \lambda} &= -0.5 \\
 (N^* \ln \lambda - 0.55) e^{N^* \ln \lambda - 0.5} &= -0.5 e^{-0.5} \\
 N^* \ln \lambda - 0.5 &= W_{-1}(-0.5 e^{-0.5}) \\
 N^* &= \frac{W_{-1}(-0.5 e^{-0.5}) + 0.5}{\ln \lambda} \approx \frac{-1.26}{\ln \lambda}
 \end{aligned} \tag{S8.2}$$

Correspondingly the maximized  $ruCNR_{bSSFP}$  is:

$$CNR_{bSSFP}(N^*) = \frac{\lambda^{N^*} - 1}{\ln \lambda} \frac{\sqrt{TR}}{\sqrt{N^*}} \sin(\alpha/2)$$

$$\begin{aligned}
&= \frac{e^{N^* \ln \lambda} - 1}{\ln \lambda} \frac{\sqrt{-\text{TR} \ln \lambda}}{\sqrt{-W_{-1}(-0.5e^{-0.5}) - 0.5}} \sin(\alpha/2) \\
&= \frac{e^{W_{-1}(-0.5e^{-0.5})+0.5} - 1}{-\sqrt{-W_{-1}(-0.5e^{-0.5}) - 0.5}} \frac{\sqrt{\text{TR}}}{\sqrt{-\ln \lambda}} \sin(\alpha/2) \\
&= \frac{e^{0.5} \frac{-0.5e^{-0.5}}{W_{-1}(-0.5e^{-0.5})} - 1}{-\sqrt{-W_{-1}(-0.5e^{-0.5}) - 0.5}} \frac{\sqrt{\text{TR}}}{\sqrt{-\ln \lambda}} \sin(\alpha/2) \\
&= \frac{\frac{-0.5 - W_{-1}(-0.5e^{-0.5})}{W_{-1}(-0.5e^{-0.5})}}{-\sqrt{-W_{-1}(-0.5e^{-0.5}) - 0.5}} \frac{\sqrt{\text{TR}}}{\sqrt{-\ln \lambda}} \sin(\alpha/2) \\
&= \frac{\sqrt{-W_{-1}(-0.5e^{-0.5}) - 0.5}}{-W_{-1}(-0.5e^{-0.5})} \frac{\sqrt{\text{TR}}}{\sqrt{-\ln \lambda}} \sin(\alpha/2) \\
&\approx 0.64 \frac{\sqrt{\text{TR}}}{\sqrt{-\ln \lambda}} \sin(\alpha/2) \tag{S8.3}
\end{aligned}$$

The derivative of  $ruCNR_{bSSFP}(N^*)$  w.r.t. flip angle  $\alpha$  is:

$$\begin{aligned}
\frac{\partial ruCNR_{bSSFP}(N^*)}{\partial \alpha} &= \frac{\partial}{\partial \alpha} 0.64 \frac{\sqrt{\text{TR}}}{\sqrt{-\ln \lambda}} \sin(\alpha/2) \\
&= 0.64 \sqrt{\text{TR}} \frac{\partial \sin(\alpha/2)}{\partial \alpha \sqrt{-\ln \lambda}} \\
&= \frac{0.64 \sqrt{\text{TR}}}{-\ln \lambda} \left( \frac{1}{2} \cos(\alpha/2) \sqrt{-\ln \lambda} - \sin(\alpha/2) \frac{\partial \lambda}{\partial \alpha} \frac{\partial}{\partial \lambda} \sqrt{-\ln \lambda} \right) \\
&= \frac{0.64 \sqrt{\text{TR}}}{-\ln \lambda} \left( \frac{1}{2} \cos(\alpha/2) \sqrt{-\ln \lambda} - \sin(\alpha/2) \frac{-1/\lambda}{2\sqrt{-\ln \lambda}} \frac{\partial}{\partial \alpha} [E_2 \sin^2(\alpha/2) + E_1 \cos^2(\alpha/2)] \right) \\
&= \frac{0.64 \sqrt{\text{TR}}}{2 \ln \lambda \sqrt{-\ln \lambda}} \left( \lambda \ln \lambda \cos(\alpha/2) - \sin(\alpha/2) \frac{\partial}{\partial \alpha} \left[ E_2 \frac{1 - \cos \alpha}{2} + E_1 \frac{1 + \cos \alpha}{2} \right] \right) \\
&= \frac{0.64 \sqrt{\text{TR}}}{2 \ln \lambda \sqrt{-\ln \lambda}} \left( \lambda \ln \lambda \cos(\alpha/2) - \frac{1}{2} \sin(\alpha/2) [E_2 \sin \alpha - E_1 \sin \alpha] \right) \\
&= \frac{0.64 \sqrt{\text{TR}}}{2 \ln \lambda \sqrt{-\ln \lambda}} \left( \lambda \ln \lambda \cos(\alpha/2) - \frac{E_2 - E_1}{2} \sin(\alpha/2) (2 \sin(\alpha/2) \cos(\alpha/2)) \right)
\end{aligned}$$

$$\begin{aligned}
&= \frac{0.64\sqrt{\text{TR}}}{2 \ln \lambda \sqrt{-\ln \lambda}} \cos(\alpha/2) (\lambda \ln \lambda - (E_2 - E_1) \sin^2(\alpha/2)) \\
&= \frac{0.64\sqrt{\text{TR}}}{2 \ln \lambda \sqrt{-\ln \lambda}} \cos(\alpha/2) (\lambda \ln \lambda - (E_2 \sin^2(\alpha/2) + E_1 \cos^2(\alpha/2)) + E_1) \\
&= \frac{0.64\sqrt{\text{TR}}}{2 \ln \lambda \sqrt{-\ln \lambda}} \cos(\alpha/2) (\lambda \ln \lambda - \lambda + E_1) \tag{S8.4}
\end{aligned}$$

It is obvious that  $\frac{0.64\sqrt{\text{TR}}}{2 \ln \lambda \sqrt{-\ln \lambda}} \cos(\alpha/2) < 0$  when  $\alpha < 180^\circ$ , so we need to consider  $\lambda \ln \lambda - \lambda + E_1$  only. When  $T_1$ ,  $T_2$ , and TR are fixed, the parameters  $E_1$  and  $E_2$  are also fixed. In this case, according to Eq. (38),  $\lambda$  is an affine combination of  $E_1$  and  $E_2$ , for  $\sin^2(\alpha/2) + \cos^2(\alpha/2) = 1$ .

Therefore,

$$\lambda = E_2 \sin^2(\alpha/2) + E_1 \cos^2(\alpha/2) \in [E_2, E_1] < 1 \tag{S8.5}$$

Now we prove that  $\lambda \ln \lambda - \lambda + E_1$  is monotonically decreasing with  $\lambda$ , i.e., its derivative is negative:

$$\frac{\partial(\lambda \ln \lambda - \lambda + E_1)}{\partial \lambda} = \ln \lambda + \lambda \frac{1}{\lambda} - 1 = \ln \lambda < 0 \tag{S8.6}$$

Therefore it reaches minimum and maximum value when  $\lambda$  is  $E_1$ , and  $E_2$ , respectively:

$$\lambda \ln \lambda - \lambda + E_1 \in [E_1 \ln E_1, E_2 \ln E_2 - E_2 + E_1] \tag{S8.7}$$

Because  $E_1 \ln E_1 \leq 0$ , if  $E_2 \ln E_2 - E_2 + E_1 < 0$ ,  $n\text{CNR}_{b\text{SSFP}}(N^*)$  is monotonically increasing with  $\alpha$  (the derivative of  $ru\text{CNR}_{b\text{SSFP}}(N^*)$  w.r.t.  $\alpha$  is positive and decreases to 0 at  $\alpha = 180^\circ$ ).

In this case the optimal  $ru\text{CNR}_{b\text{SSFP}}$  is achieved when  $\lambda = E_2$  and:

$$\alpha^*(TR) = 180^\circ$$

$$N_{bSSFP}^*(TR) = \frac{-1.26}{\ln \lambda} = \frac{-1.26}{\ln E_2} = 1.26 \frac{T_2}{TR} \quad (S8.8)$$

$$nCNR_{bSSFP}^*(TR) = 0.64 \frac{\sqrt{TR}}{\sqrt{-\ln \lambda}} \sin(\alpha^*/2) = 0.64 \frac{\sqrt{TR}}{\sqrt{-\ln E_2}} \sin(\alpha^*/2) = 0.64 \sqrt{T_2}$$

If  $E_2 \ln E_2 - E_2 + E_1 > 0$ , there is an optimal flip angle  $\alpha^* < 180^\circ$  when the derivative of  $ruCNR_{bSSFP}(N^*)$  w.r.t.  $\alpha$  is 0, i.e.,  $\lambda \ln \lambda - \lambda + E_1 = 0$ . To simplify the calculation, we define

$$x = \ln \lambda:$$

$$e^x x - e^x + E_1 = 0$$

$$(x - 1)e^x = -E_1$$

$$(x - 1)e^{x-1} = -E_1/e$$

$$x - 1 = W_{-1}(-E_1/e)$$

$$x = W_{-1}(-E_1/e) + 1$$

$$\lambda = e^x = e^{W_{-1}(-E_1/e)+1} = e^{W_{-1}(-E_1/e)} e = \frac{-E_1/e}{W_{-1}(-E_1/e)} e = \frac{-E_1}{W_{-1}(-E_1/e)}$$

$$E_2 \sin^2 \frac{\alpha^*}{2} + E_1 \cos^2 \frac{\alpha^*}{2} = \frac{-E_1}{W_{-1}(-E_1/e)}$$

$$E_2 \frac{1 - \cos \alpha^*}{2} + E_1 \frac{1 + \cos \alpha^*}{2} = \frac{-E_1}{W_{-1}(-E_1/e)}$$

$$(E_1 - E_2) \cos \alpha^* + E_1 + E_2 = \frac{-2E_1}{W_{-1}(-E_1/e)}$$

$$\cos \alpha^* = \frac{2E_1 + (E_1 + E_2)W_{-1}(-E_1/e)}{(E_2 - E_1)W_{-1}(-E_1/e)}$$

$$\alpha_{bSSFP}^*(TR) = \arccos \left( \frac{2E_1 + (E_1 + E_2)W_{-1}(-E_1/e)}{(E_2 - E_1)W_{-1}(-E_1/e)} \right)$$

(S8.9)

$$N_{bSSFP}^*(TR) = \frac{-1.26}{\ln \lambda} = \frac{-1.26}{x} = \frac{-1.26}{W_{-1}(-E_1/e) + 1}$$

According to Eq. (S8.7), the condition to accept Eq. (S8.9) rather than (S8.8) is:

$$E_2 \ln E_2 - E_2 + E_1 > 0$$

$$\left(-\frac{TR}{T_2}\right) e^{-TR/T_2} - e^{-TR/T_2} + e^{-\frac{TR}{T_1}} > 0$$

$$e^{-\frac{TR}{T_1}} > (TR/T_2 + 1)e^{-\frac{TR}{T_2}}$$

$$e^{\left(\frac{1}{T_2} - \frac{1}{T_1}\right)TR} > \frac{TR}{T_2} + 1$$

$$(TR + T_2)e^{\left(\frac{1}{T_1} - \frac{1}{T_2}\right)TR} < T_2$$

$$\left(\frac{1}{T_1} - \frac{1}{T_2}\right)(TR + T_2)e^{\left(\frac{1}{T_1} - \frac{1}{T_2}\right)TR} > \frac{T_2 - T_1}{T_1}$$

$$\left(\frac{1}{T_1} - \frac{1}{T_2}\right)(TR + T_2)e^{\left(\frac{1}{T_1} - \frac{1}{T_2}\right)(TR+T_2)} > \frac{T_2 - T_1}{T_1} e^{\frac{T_2 - T_1}{T_1}}$$

$$\left(\frac{1}{T_1} - \frac{1}{T_2}\right)(TR + T_2) < W_{-1}\left(\frac{T_2 - T_1}{T_1} e^{\frac{T_2 - T_1}{T_1}}\right)$$

$$TR > \frac{T_1 T_2}{T_2 - T_1} W_{-1}\left(\frac{T_2 - T_1}{T_1} e^{\frac{T_2 - T_1}{T_1}}\right) - T_2 \quad (\text{S8.10})$$

Here we use a property that  $W_{-1}(\cdot)$  is monotonically decreasing. We define the threshold value:

$$\overline{TR} = \frac{T_1 T_2}{T_2 - T_1} W_{-1}\left(\frac{T_2 - T_1}{T_1} e^{\frac{T_2 - T_1}{T_1}}\right) - T_2. \quad (\text{S8.11})$$

Note that the derivation in Eq. (S8.10) is reversible, i.e., the two inequalities  $E_2 \ln E_2 - E_2 + E_1 > 0$  and  $TR > \overline{TR}$  are equivalent. Therefore,  $E_2 \ln E_2 - E_2 + E_1 \leq 0$  is also equivalent to  $TR \leq \overline{TR}$ . We can combine the two conditions with a max function where the left (right) side is larger if  $TR \leq \overline{TR}$  ( $TR > \overline{TR}$ ):

$$N_{bSSFP}^*(TR) = 1.26 \max \left\{ \frac{T_2}{TR}, \frac{-1}{1 + W_{-1}(-E_1/e)} \right\}, \quad (S8.12)$$

$$\alpha_{bSSFP}^*(TR) = \arccos \left( \max \left\{ -1, \frac{2E_1 + (E_1 + E_2)W_{-1}(-E_1/e)}{(E_2 - E_1)W_{-1}(-E_1/e)} \right\} \right),$$

The corresponding maximum  $ruCNR_{bSSFP}$  is:

$$\begin{aligned} nCNR_{bSSFP}^*(TR) &= 0.64 \frac{\sqrt{TR}}{\sqrt{-\ln \lambda}} \sin \left( \frac{\alpha^*}{2} \right) \\ &= 0.64 \min \left\{ \sqrt{T_2}, \frac{\sqrt{TR}}{\sqrt{-W_{-1}(-\frac{E_1}{e}) - 1}} \right\} \frac{\sqrt{1 - \cos \alpha^*}}{\sqrt{2}} \\ &= \frac{0.64}{\sqrt{2}} \min \left\{ \sqrt{T_2}, \frac{\sqrt{TR}}{\sqrt{-W_{-1}(-\frac{E_1}{e}) - 1}} \right\} \sqrt{1 - \max \left\{ -1, \frac{2E_1 + (E_1 + E_2)W_{-1}(-\frac{E_1}{e})}{(E_2 - E_1)W_{-1}(-\frac{E_1}{e})} \right\}} \\ &= \frac{0.64}{\sqrt{2}} \min \left\{ \sqrt{T_2}, \frac{\sqrt{TR}}{\sqrt{-W_{-1}(-\frac{E_1}{e}) - 1}} \right\} \max \left\{ \sqrt{2}, \sqrt{1 - \frac{2E_1 + (E_1 + E_2)W_{-1}(-\frac{E_1}{e})}{(E_2 - E_1)W_{-1}(-\frac{E_1}{e})}} \right\} \\ &= \frac{0.64}{\sqrt{2}} \min \left\{ \sqrt{T_2}, \frac{\sqrt{TR}}{\sqrt{-W_{-1}(-\frac{E_1}{e}) - 1}} \right\} \max \left\{ \sqrt{2}, \sqrt{\frac{-2E_1 W_{-1}(-\frac{E_1}{e}) - 2E_1}{(E_2 - E_1)W_{-1}(-\frac{E_1}{e})}} \right\} \\ &= 0.64 \min \left\{ \sqrt{T_2}, \frac{\sqrt{TR}}{\sqrt{-W_{-1}(-\frac{E_1}{e}) - 1}} \right\} \max \left\{ 1, \sqrt{\frac{E_1}{E_2 - E_1} \frac{-W_{-1}(-\frac{E_1}{e}) - 1}{W_{-1}(-\frac{E_1}{e})}} \right\} \\ &= \begin{cases} 0.64\sqrt{T_2} & \text{if } TR \leq \bar{TR} \\ 0.64 \frac{\sqrt{TR \cdot E_1}}{\sqrt{(E_2 - E_1)W_{-1}(-E_1/e)}} & \text{if } TR > \bar{TR} \end{cases} \quad (S8.13) \end{aligned}$$



## Supporting Information S9: Sacrificed ruCNR of bSSFP

According to Eq. (49) the sacrificed *ruCNR* is  $\eta$  times the optimal *ruCNR*. There are multiple pairs of  $N$  and  $\alpha$  solutions for each  $\eta$ .

$$ruCNR_{bSSFP}(N^*) = \eta \cdot ruCNR_{bSSFP}^*(TR)$$

When  $TR < \overline{TR}$ , the left side of the max and min operators in  $N_{bSSFP}^*$ ,  $\alpha_{bSSFP}^*$ , and  $ruCNR_{bSSFP}^*$  are used. The one that has the minimum  $\alpha$  satisfies Eq. (S8.2) and (S8.3):

$$0.64 \frac{\sqrt{TR}}{\sqrt{-\ln \lambda}} \sin(\alpha/2) = 0.64\eta\sqrt{T_2}$$

$$\frac{\sqrt{TR}}{\sqrt{-\ln \lambda}} \sin(\alpha/2) = \eta\sqrt{T_2}$$

$$-\frac{TR}{\ln \lambda} \sin^2(\alpha/2) = \eta^2 T_2$$

$$-\frac{TR}{\eta^2 T_2} \sin^2(\alpha/2) = \ln \lambda$$

$$\frac{\ln E_2}{\eta^2} \sin^2(\alpha/2) = \ln \lambda$$

$$e^{\frac{\ln E_2}{\eta^2} \sin^2(\alpha/2)} = \lambda = E_2 \sin^2(\alpha/2) + E_1 \cos^2(\alpha/2) = (E_2 - E_1) \sin^2(\alpha/2) + E_1 \quad (S9.1)$$

To simplify the calculation, let  $x = \sin^2(\alpha/2)$ , we can rewrite Eq. (S9.1) and solve for  $x$ :

$$e^{\frac{\ln E_2 x}{\eta^2}} = (E_2 - E_1)x + E_1$$

$$[(E_2 - E_1)x + E_1] e^{-\frac{\ln E_2 x}{\eta^2}} = 1$$

$$\left(x + \frac{E_1}{E_2 - E_1}\right) e^{-\frac{\ln E_2 x}{\eta^2}} = \frac{1}{E_2 - E_1}$$

$$\begin{aligned}
& -\frac{\ln E_2}{\eta^2} \left( x - \frac{E_1}{E_1 - E_2} \right) e^{-\frac{\ln E_2}{\eta^2} x} = \frac{\ln E_2}{\eta^2 (E_1 - E_2)} \\
& -\frac{\ln E_2}{\eta^2} \left( x - \frac{E_1}{E_1 - E_2} \right) e^{-\frac{\ln E_2}{\eta^2} \left( x - \frac{E_1}{E_1 - E_2} \right)} = \frac{\ln E_2}{\eta^2 (E_1 - E_2)} e^{\frac{E_1 \ln E_2}{\eta^2 (E_1 - E_2)}} \\
& -\frac{\ln E_2}{\eta^2} \left( x - \frac{E_1}{E_1 - E_2} \right) = W_{-1} \left( \frac{\ln E_2}{\eta^2 (E_1 - E_2)} e^{\frac{E_1 \ln E_2}{\eta^2 (E_1 - E_2)}} \right) \\
& x = -\frac{\eta^2}{\ln E_2} W_{-1} \left( \frac{\ln E_2}{\eta^2 (E_1 - E_2)} e^{\frac{E_1 \ln E_2}{\eta^2 (E_1 - E_2)}} \right) + \frac{E_1}{E_1 - E_2} \tag{S9.2}
\end{aligned}$$

The optimal  $\alpha$  ( $\alpha_{bSSFP}^\eta$ ) and optimal  $N_{bSSFP}^\eta$  can then be solved. Here we use Eq. (S9.2) for the optimal N:

$$\begin{aligned}
\cos \alpha &= 1 - 2 \sin^2(\alpha/2) = 1 + \frac{2\eta^2}{\ln E_2} W_{-1} \left( \frac{\ln E_2}{\eta^2 (E_1 - E_2)} e^{\frac{E_1 \ln E_2}{\eta^2 (E_1 - E_2)}} \right) - \frac{2E_1}{E_1 - E_2} \\
&= \frac{2\eta^2}{\ln E_2} W_{-1} \left( \frac{\ln E_2}{\eta^2 (E_1 - E_2)} e^{\frac{E_1 \ln E_2}{\eta^2 (E_1 - E_2)}} \right) - \frac{E_1 + E_2}{E_1 - E_2} \\
\alpha_{bSSFP}^\eta (TR) &= \arccos \left( \frac{2\eta^2}{\ln E_2} W_{-1} \left( \frac{\ln E_2}{\eta^2 (E_1 - E_2)} e^{\frac{E_1 \ln E_2}{\eta^2 (E_1 - E_2)}} \right) - \frac{E_1 + E_2}{E_1 - E_2} \right) \tag{S9.3} \\
\lambda &= E_2 \sin^2 \left( \frac{\alpha}{2} \right) + E_1 \cos^2 \left( \frac{\alpha}{2} \right) = E_2 \frac{1 - \cos \alpha}{2} + E_1 \frac{1 + \cos \alpha}{2} \\
&= \frac{1}{2} (E_1 - E_2) \cos \alpha + \frac{1}{2} (E_1 + E_2) \\
&= \frac{1}{2} (E_1 - E_2) \frac{2\eta^2}{\ln E_2} W_{-1} \left( \frac{\ln E_2}{\eta^2 (E_1 - E_2)} e^{\frac{E_1 \ln E_2}{\eta^2 (E_1 - E_2)}} \right) - \frac{1}{2} (E_1 + E_2) + \frac{1}{2} (E_1 + E_2) \\
&= \frac{2\eta^2 (E_1 - E_2)}{\ln E_2} W_{-1} \left( \frac{\ln E_2}{\eta^2 (E_1 - E_2)} e^{\frac{E_1 \ln E_2}{\eta^2 (E_1 - E_2)}} \right) \\
&= \frac{2\eta^2 (E_1 - E_2)}{\ln E_2} \frac{\frac{\ln E_2}{\eta^2 (E_1 - E_2)} e^{\frac{E_1 \ln E_2}{\eta^2 (E_1 - E_2)}}}{\exp \left[ W_{-1} \left( \frac{\ln E_2}{\eta^2 (E_1 - E_2)} e^{\frac{E_1 \ln E_2}{\eta^2 (E_1 - E_2)}} \right) \right]} = e^{\frac{E_1 \ln E_2}{\eta^2 (E_1 - E_2)} - W_{-1} \left( \frac{\ln E_2}{\eta^2 (E_1 - E_2)} e^{\frac{E_1 \ln E_2}{\eta^2 (E_1 - E_2)}} \right)}
\end{aligned}$$

$$\ln \lambda = \frac{E_1 \ln E_2}{\eta^2(E_1 - E_2)} - W_{-1} \left( \frac{\ln E_2}{\eta^2(E_1 - E_2)} e^{\frac{E_1 \ln E_2}{\eta^2(E_1 - E_2)}} \right)$$

$$N_{bSSFP}^\eta(\text{TR}) = -\frac{1.26}{\ln \lambda} = \frac{1.26}{W_{-1} \left( \frac{\ln E_2}{\eta^2(E_1 - E_2)} e^{\frac{E_1 \ln E_2}{\eta^2(E_1 - E_2)}} \right) - \frac{E_1 \ln E_2}{\eta^2(E_1 - E_2)}} \quad (\text{S9.4})$$

When  $\text{TR} > \overline{\text{TR}}$ , the right side of the max and min operators in  $N_{bSSFP}^*$ ,  $\alpha_{bSSFP}^*$ , and  $ruCNR_{bSSFP}^*$  are used. In this case,  $\alpha_{bSSFP}^* < 180^\circ$ . A sacrificed  $ruCNR$  is also applicable to reduce the flip angles. Similarly, we use Eq. (S8.2) and (S8.3) to focus on the optimal solution that has minimal  $\alpha$ .

$$CNR_{bSSFP}(N^*) = \eta CNR_{bSSFP}^*(\text{TR})$$

$$0.64 \sqrt{\frac{\text{TR}}{-\ln \lambda}} \sin(\alpha/2) = \eta 0.64 \sqrt{\frac{\text{TR} \cdot E_1}{(E_2 - E_1) W_{-1}(-E_1/e)}}$$

$$\sqrt{\frac{\text{TR}}{-\ln \lambda}} \sin(\alpha/2) = \eta \sqrt{\frac{\text{TR} \cdot E_1}{(E_2 - E_1) W_{-1}(-E_1/e)}}$$

$$\frac{\text{TR}}{-\ln \lambda} \sin^2(\alpha/2) = \eta^2 \frac{\text{TR} \cdot E_1}{(E_2 - E_1) W_{-1}(-E_1/e)}$$

$$(E_2 - E_1) \sin^2(\alpha/2) W_{-1}(-E_1/e) = -\eta^2 E_1 \ln \lambda$$

$$(E_2 \sin^2(\alpha/2) + E_1 \cos^2(\alpha/2) - E_1) W_{-1}(-E_1/e) = -\eta^2 E_1 \ln \lambda$$

$$(\lambda - E_1) W_{-1}(-E_1/e) = -\eta^2 E_1 \ln \lambda \quad (\text{S9.5})$$

To simplify the calculation, let  $x = \ln \lambda$ , we can rewrite Eq. (S9.5) and solve for  $x$ :

$$(e^x - E_1) W_{-1}(-E_1/e) = -\eta^2 E_1 x$$

$$\eta^2 E_1 x - E_1 W_{-1}(-E_1/e) = -e^x W_{-1}(-E_1/e)$$

$$[\eta^2 E_1 x - E_1 W_{-1}(-E_1/e)] e^{-x} = -W_{-1}(-E_1/e)$$

$$[-\eta^2 E_1 x + E_1 W_{-1}(-E_1/e)] e^{-x} = W_{-1}(-E_1/e)$$

$$\begin{aligned}
\left[-x + \frac{W_{-1}(-E_1/e)}{\eta^2}\right] e^{-x} &= \frac{W_{-1}(-E_1/e)}{\eta^2 E_1} \\
\left[-x + \frac{W_{-1}(-E_1/e)}{\eta^2}\right] e^{-x + \frac{W_{-1}(-E_1/e)}{\eta^2}} &= \frac{W_{-1}(-E_1/e)}{\eta^2 E_1} e^{\frac{W_{-1}(-E_1/e)}{\eta^2}} \\
-x + \frac{W_{-1}(-E_1/e)}{\eta^2} &= W_{-1}\left(\frac{W_{-1}(-E_1/e)}{\eta^2 E_1} e^{\frac{W_{-1}(-E_1/e)}{\eta^2}}\right) \\
x = \ln \lambda &= \frac{W_{-1}(-E_1/e)}{\eta^2} - W_{-1}\left(\frac{W_{-1}(-E_1/e)}{\eta^2 E_1} e^{\frac{W_{-1}(-E_1/e)}{\eta^2}}\right) \tag{S9.6}
\end{aligned}$$

The optimal  $\alpha$  ( $\alpha_{bSSFP}^\eta$ ) and optimal  $N_{bSSFP}^\eta$  can then be solved. Here we use Eq. (S8.2) for the optimal N:

$$\begin{aligned}
N_{bSSFP}^\eta &= \frac{1.26}{-\ln \lambda} = \frac{1.26}{-\frac{W_{-1}(-E_1/e)}{\eta^2} + W_{-1}\left(\frac{W_{-1}(-E_1/e)}{\eta^2 E_1} e^{\frac{W_{-1}(-E_1/e)}{\eta^2}}\right)} \\
&= \frac{1.26}{W_{-1}\left(\frac{W_{-1}(-E_1/e)}{\eta^2 E_1} e^{\frac{W_{-1}(-E_1/e)}{\eta^2}}\right) - \frac{W_{-1}(-E_1/e)}{\eta^2}} \\
\lambda &= e^{\frac{W_{-1}(-E_1/e)}{\eta^2}} e^{-W_{-1}\left(\frac{W_{-1}(-E_1/e)}{\eta^2 E_1} e^{\frac{W_{-1}(-E_1/e)}{\eta^2}}\right)} = e^{\frac{W_{-1}(-E_1/e)}{\eta^2}} \frac{W_{-1}\left(\frac{W_{-1}(-E_1/e)}{\eta^2 E_1} e^{\frac{W_{-1}(-E_1/e)}{\eta^2}}\right)}{\frac{W_{-1}(-E_1/e)}{\eta^2 E_1} e^{\frac{W_{-1}(-E_1/e)}{\eta^2}}} \\
&= \frac{\eta^2 E_1 W_{-1}\left(\frac{W_{-1}(-E_1/e)}{\eta^2 E_1} e^{\frac{W_{-1}(-E_1/e)}{\eta^2}}\right)}{W_{-1}(-E_1/e)} \\
\lambda &= E_2 \sin^2 \frac{\alpha}{2} + E_1 \cos^2 \frac{\alpha}{2} = E_2 \frac{1 - \cos \alpha}{2} + E_1 \frac{1 + \cos \alpha}{2} = -\frac{E_2 - E_1}{2} \cos \alpha + \frac{E_1 + E_2}{2} \\
\cos \alpha &= \frac{E_1 + E_2}{E_2 - E_1} - \frac{2}{E_2 - E_1} \lambda = \frac{(E_1 + E_2)W_{-1}(-E_1/e) - 2\eta^2 E_1 W_{-1}\left(\frac{W_{-1}(-E_1/e)}{\eta^2 E_1} e^{\frac{W_{-1}(-E_1/e)}{\eta^2}}\right)}{(E_2 - E_1)W_{-1}(-E_1/e)}
\end{aligned}$$

$$\begin{aligned}
\alpha_{bSSFP}^\eta &= \arccos \frac{(E_1 + E_2)W_{-1}(-E_1/e) - 2\eta^2 E_1 W_{-1}\left(\frac{W_{-1}(-E_1/e)}{\eta^2 E_1} e^{\frac{W_{-1}(-E_1/e)}{\eta^2}}\right)}{(E_2 - E_1)W_{-1}(-E_1/e)} \\
&= \arccos \left( \frac{2\eta^2 E_1}{(E_1 - E_2)W_{-1}(-E_1/e)} W_{-1}\left(\frac{W_{-1}(-E_1/e)}{\eta^2 E_1} e^{\frac{W_{-1}(-E_1/e)}{\eta^2}}\right) - \frac{E_1 + E_2}{E_1 - E_2} \right)
\end{aligned} \tag{S9.7}$$

The  $\alpha$  can be reduced when both  $\text{TR} \leq \overline{\text{TR}}$  and  $\text{TR} > \overline{\text{TR}}$ . Now we define a parameter:

$$x = \begin{cases} \frac{\ln E_2}{\eta^2(E_1 - E_2)} & \text{if } \text{TR} \leq \overline{\text{TR}} \\ \frac{W_{-1}(-E_1/e)}{\eta^2 E_1} & \text{if } \text{TR} > \overline{\text{TR}} \end{cases} \tag{S9.8}$$

With this parameter, Eq. (S8.3) and (S8.6) can be combined for  $\text{TR} \leq \overline{\text{TR}}$  and  $\text{TR} > \overline{\text{TR}}$ :

$$\begin{aligned}
N_{bSSFP}^\eta &= \frac{1.26}{W_{-1}(x e^{x E_1}) - x E_1} \\
\alpha_{bSSFP}^\eta &= \arccos \left( \frac{2W_{-1}(x e^{x E_1})/x - E_1 - E_2}{E_1 - E_2} \right).
\end{aligned} \tag{S9.9}$$
